# Supplementary material for: Electrophysiological and Behavioral Evidence for Hyper- and Hyposensitivity in Rare Genetic Syndromes Associated with Autism
Source: MDPI journal article supplement (doi:10.3390/genes13040671), 2022-04-11
Supplement: s1 [file s1]

Supplementary Table S1. Description of the experimental ERP papers included in the review.

| Reference                    | Experimental groups                    | Paradigm/task                                                                                                                                                                                             | Main results                                                                                                                                                  |
|------------------------------|----------------------------------------|-----------------------------------------------------------------------------------------------------------------------------------------------------------------------------------------------------------|---------------------------------------------------------------------------------------------------------------------------------------------------------------|
| <b>Fragile X syndrome</b>    |                                        |                                                                                                                                                                                                           |                                                                                                                                                               |
| (Castrén и др., 2003)        | 5 FXS patients<br>4 control subjects   | 1. auditory oddball paradigm: standard tones (85% occurrence) at a frequency of 800 Hz and deviant ones at a frequency of 560 Hz<br>2. auditory gating task (four identical tones)                        | ↑ amplitude of N1 to auditory stimuli in both tasks<br>no N1 habituation in gating task                                                                       |
| (Rojas и др., 2001)          | 11 FXS patients<br>11 control subjects | 1000-Hz pure tones                                                                                                                                                                                        | ↑ amplitude of N100m                                                                                                                                          |
| (Van der Molen и др., 2012b) | 16 FXS patients<br>20 control subjects | auditory oddball paradigm: standard tones (90% occurrence) at a frequency of 1000 Hz and deviant ones at a frequency of 1500 Hz                                                                           | ↑ amplitude of N1 to standard stimuli<br>↑ amplitude of P2 to standard stimuli<br>↓ MMN amplitude<br>↓ P3a amplitude to deviant stimuli                       |
| (Ethridge и др., 2019)       | 38 FXS patients<br>40 control subjects | 1. four 50-ms white noise bursts of 50 ms duration<br>2. chirp stimuli (white bursts modulated by sinusoid in frequency from 0 to 1000 Hz)                                                                | ↑ amplitude of N1<br>↑ amplitude of P2                                                                                                                        |
| (Ethridge и др., 2016)       | 14 FXS patients<br>15 control subjects | auditory gating task (four identical tones)                                                                                                                                                               | ↓ habituation in N1 component<br>↓ amplitude of N2                                                                                                            |
| (Knoth и др., 2014)          | 12 FXS patients<br>12 control subjects | 1. auditory modality: 50 ms broadband noise presented 150 times<br>2. visual modality: black-and-white checkerboard pattern                                                                               | ↑ amplitude of N1 to auditory stimuli<br>↑ amplitude of P2 to auditory stimuli<br>↑ latency of N2 to auditory stimuli<br>↑ amplitude of N70 to visual stimuli |
| (Côté и др., 2021)           | 14 FXS patients<br>55 control subjects | sequences of four vowels                                                                                                                                                                                  | ↑ N1-P2 peak-to-peak value                                                                                                                                    |
| (Van der Molen и др., 2012a) | 16 FXS patients<br>22 control subjects | 1. auditory modality: auditory oddball paradigm: standard tones (90% occurrence) at a frequency of 1000 Hz and deviant ones at a frequency of 1500 Hz<br>2. visual modality: blue and yellow smiley faces | ↑ amplitude of N1 and N2 to both auditory and visual stimuli<br>↓ P3b amplitude                                                                               |
| (Rigoulot и др., 2017)       | 17 FXS patients<br>26 control subjects | neutral faces, each repeated successively ten times                                                                                                                                                       | ↑ N170 amplitude for the second presentation of a stimulus compared to controls                                                                               |
| (St Clair и др., 1987)       | 33 FXS patients<br>83 control subjects | auditory oddball paradigm: standard tones at a frequency of 1000 Hz and deviant ones at a frequency of 1500 Hz                                                                                            | ↑ amplitude of N1 to standard stimuli<br>↑ amplitude of P2 to standard stimuli<br>↓ P3 amplitude                                                              |
| <b>Angelman syndrome</b>     |                                        |                                                                                                                                                                                                           |                                                                                                                                                               |

|                                 |                                                                                                         |                                                                                                                                                                                                                                                               |                                                                                                                                                                                                                         |
|---------------------------------|---------------------------------------------------------------------------------------------------------|---------------------------------------------------------------------------------------------------------------------------------------------------------------------------------------------------------------------------------------------------------------|-------------------------------------------------------------------------------------------------------------------------------------------------------------------------------------------------------------------------|
| (Key и др., 2018)               | 15 del AS patients<br>15 control subjects                                                               | Sequence of nonwords, random stimuli were repeated                                                                                                                                                                                                            | Larger parietal responses within 200-500 latency were associated with better communication skills reported by caregivers                                                                                                |
| (Key & Jones, 2019)             | 13 del AS patients                                                                                      | Novel names and names of participants and their close relatives were presented                                                                                                                                                                                | No differences in ERP components on response to novel and familiar names                                                                                                                                                |
| (Egawa и др., 2008)             | 11 del AS patients<br>2 non-del AS patients<br>6 patients with epilepsy (non-AS)<br>11 control subjects | Electrical median nerve stimulation                                                                                                                                                                                                                           | ↑ N1m and P1m latencies in del-AS compared with non-del AS patients and control subjects<br>↑ N1m amplitude in del-AS patients                                                                                          |
| (Guerrini и др., 1996)          | 11 AS patients                                                                                          | Electrical median nerve stimulation<br>Transcranial magnetic stimulation to evoke motor potentials                                                                                                                                                            | ↑ SEPs were prolonged in 5 patients<br>↓ silent period following motor evoked potentials                                                                                                                                |
| <b>Phelan-McDermid Syndrome</b> |                                                                                                         |                                                                                                                                                                                                                                                               |                                                                                                                                                                                                                         |
| (Grosman и др., б. д.)          | 5 PMS patients<br>8 ASD patients<br>9 control subjects                                                  | auditory steady-state response paradigm, ASSR (40-Hz click trains)                                                                                                                                                                                            | ↓ ASSR for both PMS and ASD patients                                                                                                                                                                                    |
| (Neklyudova и др., 2021)        | 1 patient with microduplication of SHANK3 gene<br>32 control subjects                                   | auditory steady-state response paradigm, ASSR (40-Hz click trains)                                                                                                                                                                                            | ↓ ASSR                                                                                                                                                                                                                  |
| (Isenstein и др., 2018)         | 6 PMS patients<br>7 control subjects                                                                    | 1000-Hz pure tones                                                                                                                                                                                                                                            | ↓ P2 amplitude<br>↑ P2 habituation                                                                                                                                                                                      |
| (Reese, 2019)                   | 37 PMS patients<br>15 control subjects                                                                  | auditory gating task: broadband noise bursts in pairs                                                                                                                                                                                                         | ↓ P50 amplitude                                                                                                                                                                                                         |
| (Ponson и др., 2018)            | 10 PMS subjects<br>no data about control group                                                          | auditory oddball paradigm: standard tones (85% occurrence) at a frequency of 1000 Hz and deviant ones at a frequency of 1100 Hz                                                                                                                               | ↑ N250 latency in patients with ASD than in norm                                                                                                                                                                        |
| (Brittenham, 2017)              | 17 PMS patients<br>24 ASD patients<br>12 control subjects                                               | black-and-white checkerboard                                                                                                                                                                                                                                  | ↓ P60-N75 amplitude<br>↓ N75-P100 amplitude                                                                                                                                                                             |
| (Siper и др., 2021)             | 31 PMS patients<br>79 patients with idiopathic ASD<br>45 control subjects                               | black-and-white checkerboard                                                                                                                                                                                                                                  | ↓ amplitude of P60-N75 deletion size was negatively correlated with P60-N75 amplitude                                                                                                                                   |
| <b>Rett syndrome</b>            |                                                                                                         |                                                                                                                                                                                                                                                               |                                                                                                                                                                                                                         |
| (Sysoeva и др., 2020)           | 12 RS patients<br>21 control subjects                                                                   | 1. auditory oddball paradigm for tones: standard tones (85% occurrence) at a frequency of 1000 Hz and deviant ones at a frequency of 500 Hz<br>2. auditory oddball paradigm for phonemes: standard phonema (85% occurrence) was 'ba' and deviant one was 'da' | ↑ P1 amplitude was greater for phonemes in control subjects, but not in RS patients<br>no P2 component for both tones and phonemes in RS patients<br>negative correlation between P2 amplitude and severity of symptoms |

|                           |                                       |                                                                                                                                                                                                                                                      |                                                                                                                                                                                                                                                                                             |
|---------------------------|---------------------------------------|------------------------------------------------------------------------------------------------------------------------------------------------------------------------------------------------------------------------------------------------------|---------------------------------------------------------------------------------------------------------------------------------------------------------------------------------------------------------------------------------------------------------------------------------------------|
| (Badr и др., 1987)        | 7 RS patients<br>58 control subjects  | 1. tone bursts<br>2. auditory oddball paradigm: standard tones (75% occurrence) at a frequency of 1000 Hz and deviant ones at a frequency of 2000 Hz<br>3. visual modality: flash stimulation                                                        | ↑ N1, P2 latencies in auditory modality<br>↑ P3 latency to deviant stimuli in auditory modality<br>↑ P1 latency in visual modality                                                                                                                                                          |
| (Foxe и др., 2016)        | 14 RS patients<br>22 control subjects | auditory oddball paradigm: standard tones (85% occurrence) at a frequency of 503 Hz and deviant ones at a frequency of 996 Hz                                                                                                                        | ↑ MMN latency                                                                                                                                                                                                                                                                               |
| (Brima и др., 2019)       | 11 RS patients<br>24 control subjects | auditory oddball paradigm: standard stimuli had duration of 100 ms and deviant ones had duration of 180 ms. Interstimulus intervals were different: 450, 900 and 1800 ms                                                                             | ↓ MMN with interstimulus interval of 450 ms and no MMN with longer intervals                                                                                                                                                                                                                |
| (Saunders и др., 1995)    | 17 RS patients<br>18 control subjects | 1. visual oddball paradigm<br>2. auditory oddball paradigm: standard tones (80% occurrence) at a frequency of 440 Hz and deviant ones at a frequency of 880 Hz                                                                                       | no developmental changes (reduction in amplitude and latency) of P1 components to visual stimuli in RS patients<br>absence of developmental changes (reduction in amplitude and latency) of N2 components to auditory stimuli in RS patients<br>no P3 component to deviant auditory stimuli |
| (LeBlanc и др., 2015)     | 34 RS patients<br>20 control subjects | visual modality: black and white checks                                                                                                                                                                                                              | ↓ N1-P2 complex amplitude<br>↑ N2 latency                                                                                                                                                                                                                                                   |
| (Yoshikawa и др., 1991)   | 10 RS patients                        | Electrical median nerve stimulation                                                                                                                                                                                                                  | ↑ SEP in 7 of 10 patients                                                                                                                                                                                                                                                                   |
| (Yamanouchi и др., 1993)  | 9 RS patients<br>54 control subjects  | visual modality: white flashed<br>somatosensory modality: electrical median nerve stimulation                                                                                                                                                        | ↑ P30-N35 amplitude to somatosensory stimulation                                                                                                                                                                                                                                            |
| <b>Tuberous sclerosis</b> |                                       |                                                                                                                                                                                                                                                      |                                                                                                                                                                                                                                                                                             |
| (Côté и др., 2021)        | 9 TSC patients<br>55 control subjects | sequences of four vowels                                                                                                                                                                                                                             | ↓ P1-N1 complex amplitude                                                                                                                                                                                                                                                                   |
| (Seri и др., 1999)        | 14 TSC patients (7 with ASD)          | auditory oddball paradigm for tones: standard tones (80% occurrence) at a frequency of 1000 Hz and deviant ones at a frequency of 1500 Hz                                                                                                            | ↓ N1 amplitude<br>↑ latency subgroup with ASD<br>↑ MMN latency in subgroup with ASD                                                                                                                                                                                                         |
| (O'Brien и др., 2020)     | 9 TSC patients<br>9 control subjects  | auditory oddball paradigm for tones: standard tones (85% occurrence) at a frequency of 800 Hz and deviant ones at a frequency of 400 Hz<br>auditory oddball paradigm for phonemes: standard phoneme (85% occurrence) was 'a' and deviant one was 'u' | ↑ P1 and N2 amplitude to vowels compared to tones in controls, but not in TSC patients<br>= MMN between control subjects and TSC, however in patients with both TSC and ASD ↓ MMN amplitude                                                                                                 |

|                                 |                                                            |                                                                                                                                                                                                                 |                                                                                                                 |
|---------------------------------|------------------------------------------------------------|-----------------------------------------------------------------------------------------------------------------------------------------------------------------------------------------------------------------|-----------------------------------------------------------------------------------------------------------------|
| (Jeste и др., 2013)             | 28 TSC patients<br>26 control subjects                     | presentation of pictures of a caregiver and gender- and age-matched stranger                                                                                                                                    | ↑ N290 latency                                                                                                  |
| (Tye и др., 2015)               | 14 TSC patients (4 with ASD)<br>13 control subjects        | Presentation of faces, either upright or inverted                                                                                                                                                               | ↑ N170 in TSC and ASD to typical faces<br>↑ N170 to inverted faces in controls and TSC, but not in TSC with ASD |
| (Varcin и др., 2016)            | 16 infants with TSC patients<br>18 control infants         | black-and-white checkerboard                                                                                                                                                                                    | no difference in amplitude of latencies of ERP components were found                                            |
| <b>Neurofibromatosis type 1</b> |                                                            |                                                                                                                                                                                                                 |                                                                                                                 |
| (Ammendola и др., 2006)         | 21 NF1 patients                                            | 1. black-and-white checkerboard<br>2. electrical stimulation of posterior tibial nerve at the ankle                                                                                                             | ↑ P100 latency in visual modality<br>↑ P37 latency somatosensory modality                                       |
| (Yerdelen и др., 2011)          | 39 NF1 patients                                            | 1. black-and-white checkerboard<br>3. electrical stimulation of the median nerve at the level of the wrist                                                                                                      | ↑ P100 latency in visual modality<br>↑ latency of somatosensory EP                                              |
| (Begum-Ali и др., 2021)         | 25 NF1 patients (infants)<br>52 control subjects (infants) | auditory oddball paradigm for tones: standard vowels /u/ (50% occurrence) at a frequency of 500 Hz and deviant ones were /u/ at a frequency of 650 Hz (25%) of deviant vowel /i/ at a frequency of 500 Hz (25%) | ↑ latency of pitch -change detection in infants with NF1                                                        |
| (Iannaccone и др., 2002)        | 16 NF1 patients<br>13 control subjects                     | pattern-reversal and flash stimuli                                                                                                                                                                              | ↑ P1 latency<br>absent P2 component in 3 patients                                                               |
| (Ribeiro и др., 2015)           | 16 NF1 patients<br>16 control subjects                     | visual Go/NoGo task                                                                                                                                                                                             | ↓ P1 amplitude<br>↓ P3 amplitude<br>P3b in response to irrelevant stimuli was not reduced                       |
| (Bluschke и др., 2017)          | 14 NF1 patients<br>22 control subjects                     | Flanker task                                                                                                                                                                                                    | ↓ the conflict-modulation of N2 in NF1 group<br>↑ N450 amplitude of N450 component                              |
| (Pobric и др., 2021)            | 16 NF1 patients<br>16 control subjects                     | 1 N-back and 2 N-back tasks                                                                                                                                                                                     | ↓ P3 latency                                                                                                    |
